# Supplementary material for: Mitochondrial‐Targeted CS@KET/P780 Nanoplatform for Site‐Specific Delivery and High‐Efficiency Cancer Immunotherapy in Hepatocellular Carcinoma
Source: Adv Sci (Weinh). 2024 Feb 2;11(14):2308027. doi: 10.1002/advs.202308027 (PMC11005749; doi:10.1002/advs.202308027)
Supplement: Supplementary file 1 — Supporting Information [file ADVS-11-2308027-s001.pdf]

## Supporting Information

for *Adv. Sci.*, DOI 10.1002/advs.202308027

Mitochondrial-Targeted CS@KET/P780 Nanoplatfom for Site-Specific Delivery and High-Efficiency Cancer Immunotherapy in Hepatocellular Carcinoma

*Shanshan Liu, Hailong Tian, Hui Ming, Tingting Zhang, Yajie Gao, Ruolan Liu, Lihua Chen, Chen Yang, Edouard C. Nice, Canhua Huang, Jinku Bao\*, Wei Gao\* and Zheng Shi\**

# Supporting Information

## **Mitochondrial-Targeted CS@KET/P780 Nanoplatfrom for Site-Specific Delivery and High-Efficiency Cancer Immunotherapy in Hepatocellular Carcinoma**

Shanshan Liu<sup>a,b,1</sup>, Hailong Tian<sup>c,1</sup>, Hui Ming<sup>c,1</sup>, Tingting Zhang<sup>c</sup>, Yajie Gao<sup>d</sup>, Ruolan Liu<sup>e</sup>, Lihua Chen<sup>e</sup>, Chen Yang<sup>e</sup>, Edouard C. Nice<sup>f</sup>, Canhua Huang<sup>c</sup>, Jinku Bao<sup>g,\*</sup>, Wei Gao<sup>h,\*</sup>, Zheng Shi<sup>a,b,\*</sup>

<sup>a</sup>*Clinical Medical College, Affiliated Hospital of Chengdu University, Chengdu University, Chengdu, 610106, China.*

<sup>b</sup>*Department of Clinical Pharmacy, School of Pharmacy, Zunyi Medical University, Zunyi, 563006, China.*

<sup>c</sup>*State Key Laboratory of Biotherapy and Cancer Center, West China Hospital, and West China School of Basic Medical Sciences & Forensic Medicine, Sichuan University, Collaborative Innovation Center for Biotherapy, Chengdu, 610041, China.*

<sup>d</sup>*The First Affiliated Hospital of Ningbo University, Ningbo, 315020, China.*

<sup>e</sup>*School of Basic Medical Sciences, Chengdu University of Traditional Chinese Medicine, Chengdu, 611137, China.*

<sup>f</sup>*Department of Biochemistry and Molecular Biology, Monash University, Clayton, VIC, 3800, Australia.*

<sup>g</sup>*College of Life Sciences, Sichuan University, Chengdu, 610064, China.*

<sup>h</sup>*Clinical Genetics Laboratory, Affiliated Hospital & Clinical Medical College of Chengdu University, Chengdu, 610081, China.*

<sup>1</sup>These authors contributed equally to this work.

\*Corresponding authors.

28 E-mail: baojinku@scu.edu.cn, gaowei@cdu.edu.cn, shizheng@cdu.edu.cn

29

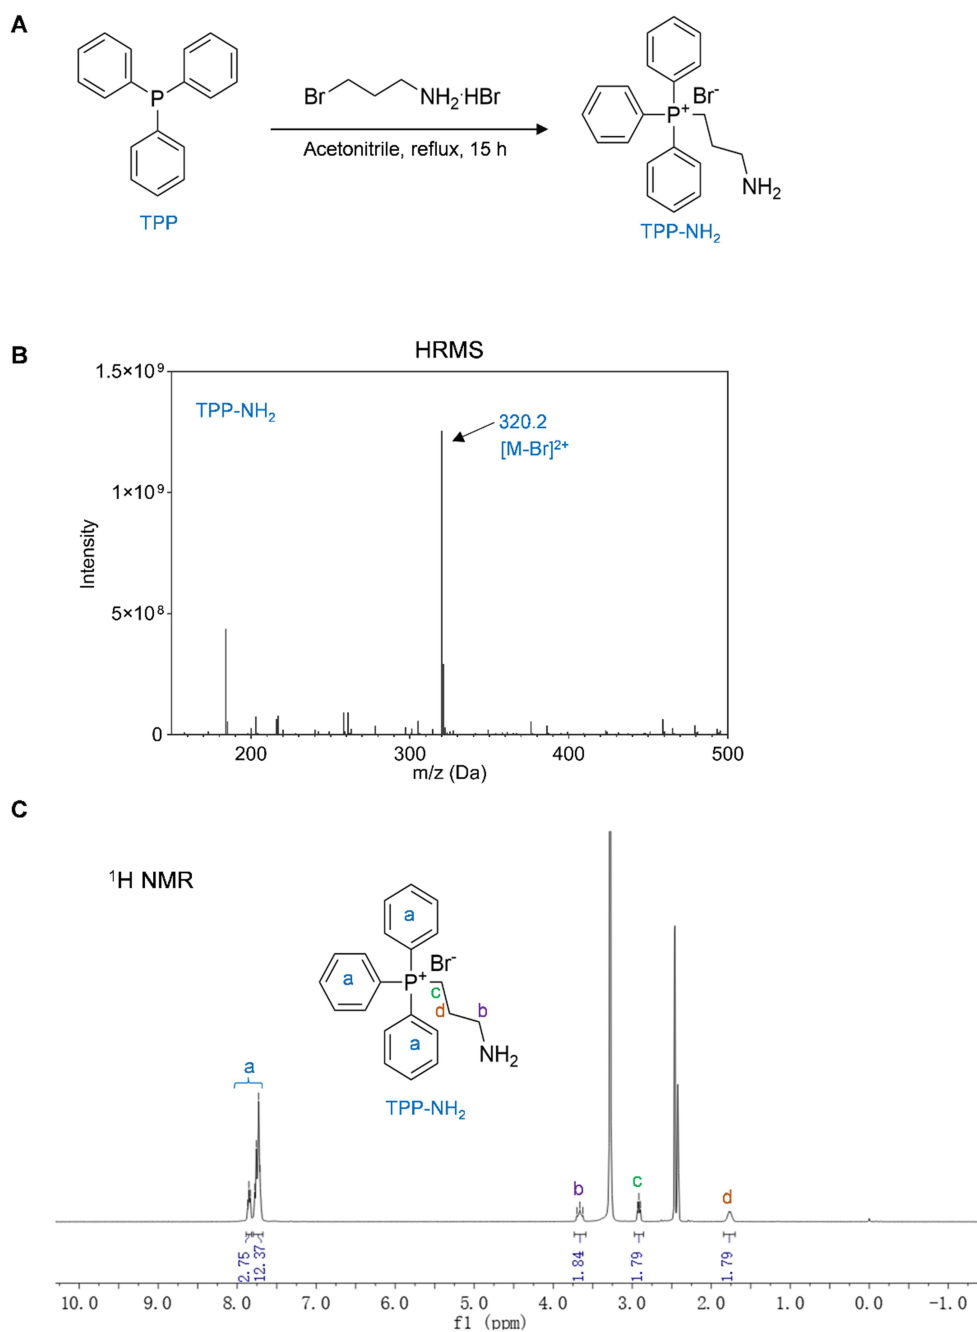

30

31 **Figure S1. Reagent synthesis of TPP-NH<sub>2</sub>.** (A) Synthetic route of TPP-NH<sub>2</sub>. (B) <sup>1</sup>H

32 NMR spectrum of TPP-NH<sub>2</sub> in DMSO-*d*<sub>6</sub>. (C) HR-MS of TPP-NH<sub>2</sub>.

33

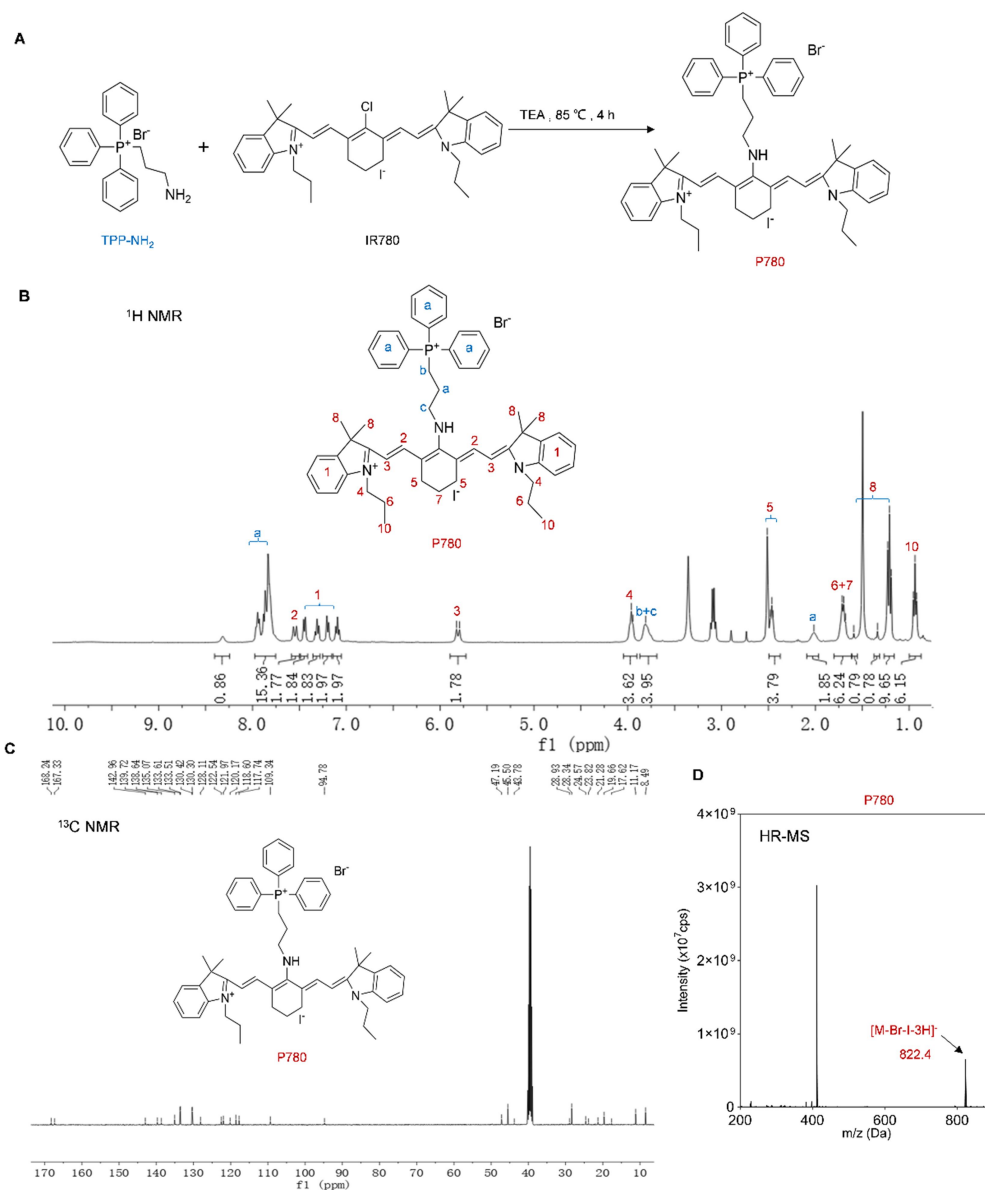

**Figure S2. Reagent synthesis of P780.** (A) Synthetic route of P780 conjugate. (B)  $^1\text{H}$  NMR spectrum of P780 in  $\text{DMSO}-d_6$ . (C)  $^{13}\text{C}$  NMR spectrum of P780 in  $\text{DMSO}-d_6$ . (D) HR-MS of P780.

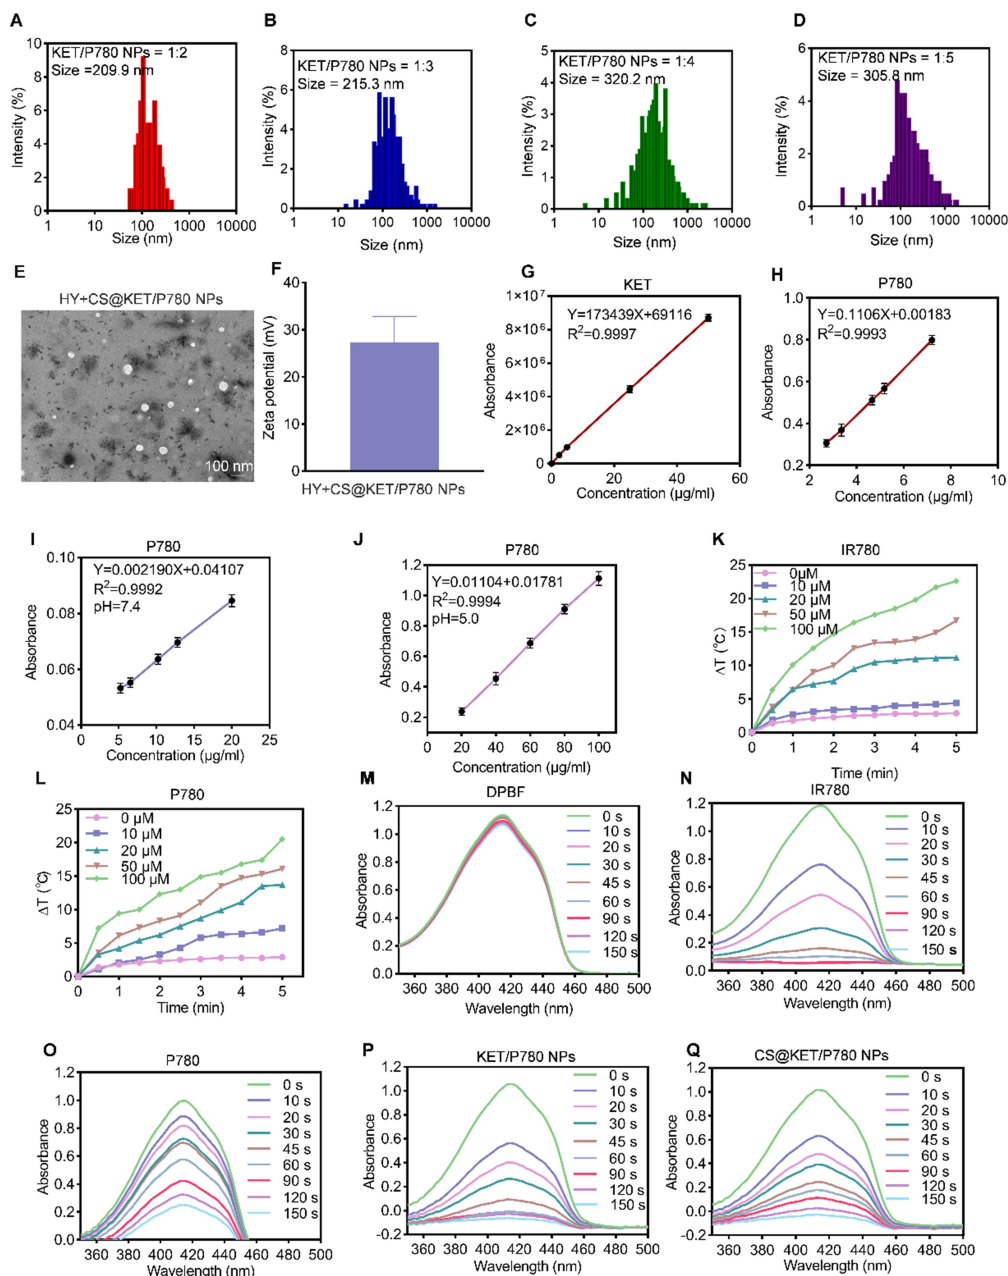

**Figure S3.** Preparation and characterization of CS@KET/P780 NPs. (The following experimental conditions are: 808 nm for IR780, 660 nm for P780, KET/P780 NPs and CS@KET/P780 NPs;  $P = 1.0 \text{ W cm}^{-2}$ , irradiation time = 30 s;  $C_{\text{KET}} = 4.5 \mu\text{M}$ ,  $C_{\text{P780}} = 2.5 \mu\text{M}$ ). (A-D) Size distribution of KET/P780 NPs at different mass ratios of KET and P780. (E) TEM image of the CS@KET/P780 NPs after cleavage. (F) Zeta potential of the CS@KET/P780 NPs after cleavage. (G) Standard curve of KET was established by HPLC ( $n = 3$ ). (H) Standard curve of P780 ( $n = 3$ ). (I-J) Standard

curves of P780 at pH values of 7.4 and 5.0 ( $n = 3$ ). (K-L) The photothermal efficiency of IR780 and P780 distributed in water with indicated concentrations. (M-Q) Levels of DPBF that remain after laser irradiation in the given groupings (150 s,  $1.0 \text{ W cm}^{-2}$ ).

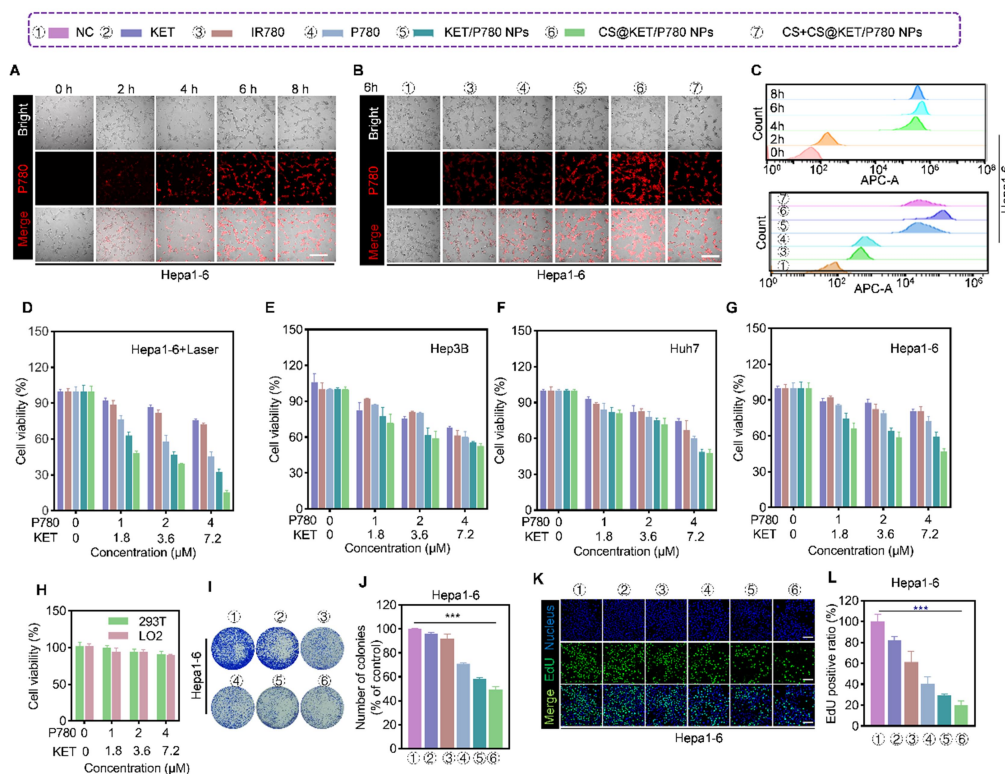

52

**Figure S4.** The cellular uptake and cytotoxicity of CS@KET/P780 NPs *in vitro*. (The following experimental conditions are: 808 nm for IR780, 660 nm for P780, KET/P780 NPs and CS@KET/P780 NPs;  $P = 1.0 \text{ W cm}^{-2}$ , irradiation time = 30 s;  $C_{\text{KET}} = 4.5 \mu\text{M}$ ,  $C_{\text{P780}} = 2.5 \mu\text{M}$ ). (A) Images captured by fluorescence microscopy show the cellular uptake of CS@KET/P780 NPs in Hepa1-6 cells at various intervals. Scale bar: 50  $\mu\text{m}$ . (B) Fluorescence microscopy pictures of the cellular uptake of IR780, P780, KET/P780 NPs, CS@KET/P780 NPs, and CS+CS@KET/P780 NPs (cells were treated with CS for half an hour beforehand) in Hepa1-6 cells following 4-hour incubation. Scale bar: 50  $\mu\text{m}$ . (C) Flow cytometry results of corresponding cellular uptake in Hepa1-6 cells. (D) Viability of Hepa1-6 cells treated with KET, IR780, P780, KET/P780 NPs, and CS@KET/P780 NPs after NIR laser irradiation.

(E-G) Viability of Hep3B, Huh7, and Hepa1-6 cells treated with CS@KET/P780 NPs, KET/P780 NPs, P780, IR780 and KET without laser irradiation. (H) The viability of LO2 and 293 T cells following treatment with CS@KET/P780 NPs at different concentrations. (I-J) Representative images for colony development and quantitative analysis of Hepa1-6 cells under different treatments. (K-L) EdU labeling test quantitative analysis and fluorescence microscopy in Hepa1-6 cells with various treatments. Scale bar: 50  $\mu\text{m}$ . (\*\* $P < 0.001$ , one-way ANOVA).

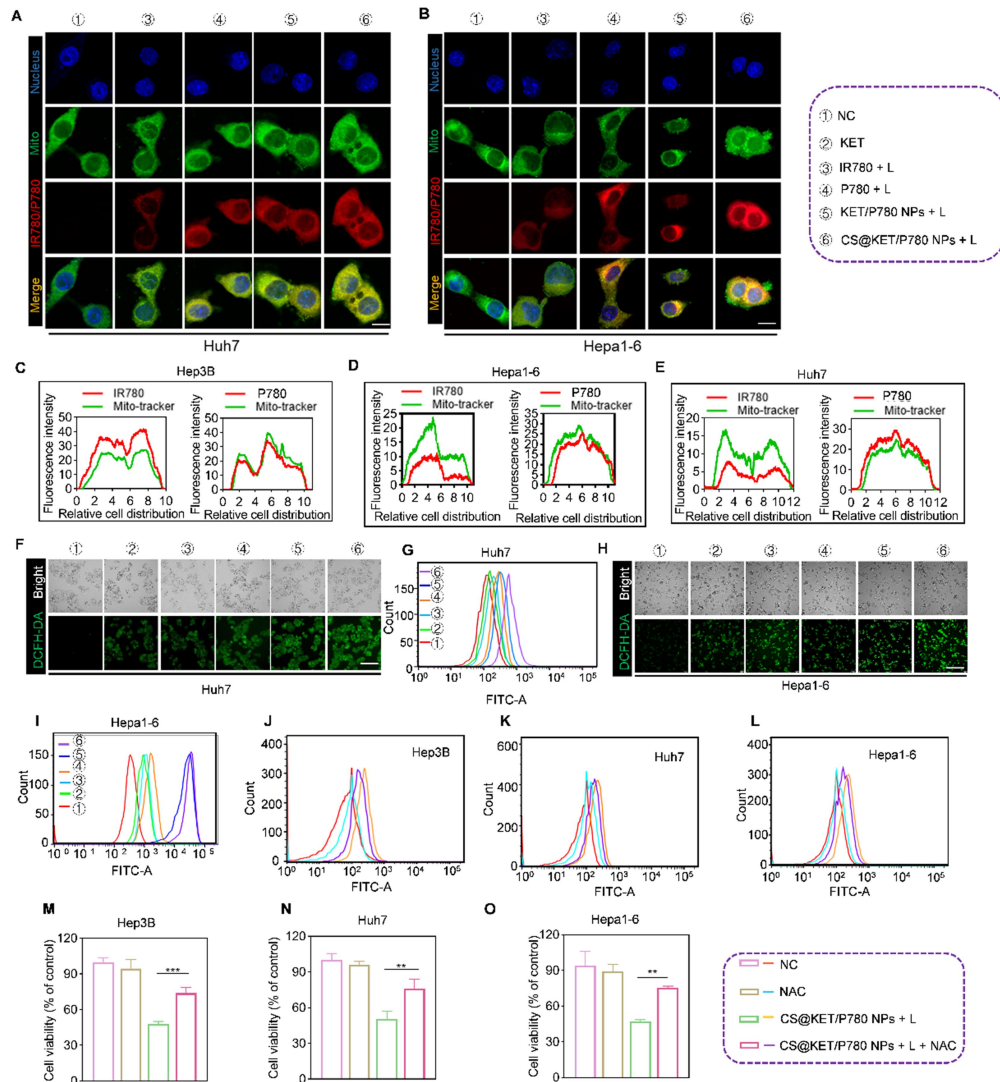

**Figure S5.** CS@KET/P780 NPs cause ROS buildup and mitochondrial dysfunction in liver cancer cells (808 nm for IR780, 660 nm for P780, KET/P780 NPs and

CS@KET/P780 NPs;  $P = 1.0 \text{ W cm}^{-2}$ , irradiation time = 30 s;  $C_{\text{KET}} = 4.5 \text{ }\mu\text{M}$ ,  $C_{\text{P780}} = 2.5 \text{ }\mu\text{M}$ ). (A-B) LSCM images to display subcellular localization of P780 or IR780 in Huh7 and Hepa1-6 cells under different therapies. Scale bar: 10  $\mu\text{m}$ . (C-E) Pearson's correlation coefficient analysis of the co-location with mitochondria in HCC cells under different treatments. (F, H) Fluorescence images and (G, I) intracellular ROS levels of Huh7 and Hepa1-6 cells examined using flow cytometry DCFH-DA probe. Scale bar: 100  $\mu\text{m}$ . (J-L) Analysis of intracellular ROS production of NAC-treated Hep3B, Huh7, and Hepa1-6 cells using flow cytometry. (M-O) Hep3B, Huh7, and Hepa1-6 cells viability of certain populations with or without NAC (10  $\mu\text{M}$ ) treatment. (\*\* $P < 0.01$ ; \*\*\* $P < 0.001$ , one-way ANOVA).

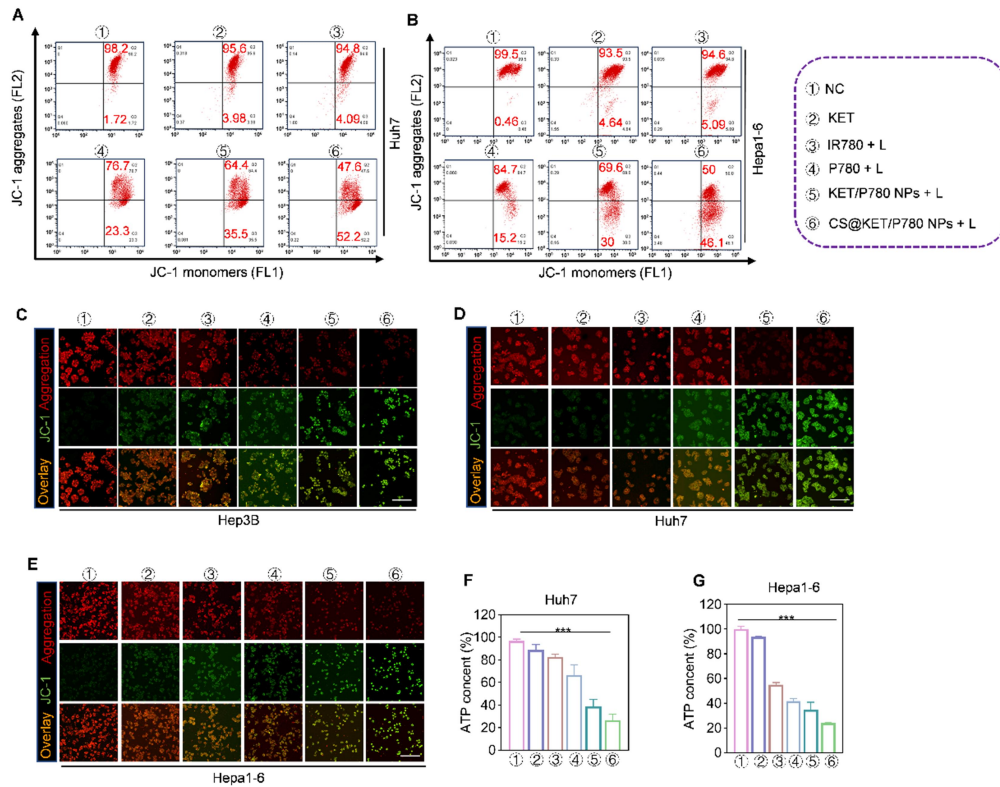

**Figure S6.** CS@KET/P780 NPs induces mitochondrial dysfunction in HCC cells (808 nm for IR780, 660 nm for P780, KET/P780 NPs and CS@KET/P780 NPs;  $P = 1.0 \text{ W cm}^{-2}$ , irradiation time = 30 s;  $C_{\text{KET}} = 4.5 \text{ }\mu\text{M}$ ,  $C_{\text{P780}} = 2.5 \text{ }\mu\text{M}$ ). (A-B) Flow cytometry investigation for potential of the mitochondrial membrane of Huh7 and Hepa1-6 cells following different treatments. (C-E) Fluorescence images for

90 mitochondrial membrane potential of Hep3B, Huh7, and Hepa1-6 cells determined by  
 91 JC-1 assay. Scale bar: 100  $\mu\text{m}$ . (F-G) ATP content in Huh7 and Hepa1-6 cells  
 92 following different treatments. (\*\* $P < 0.001$ , one-way ANOVA).

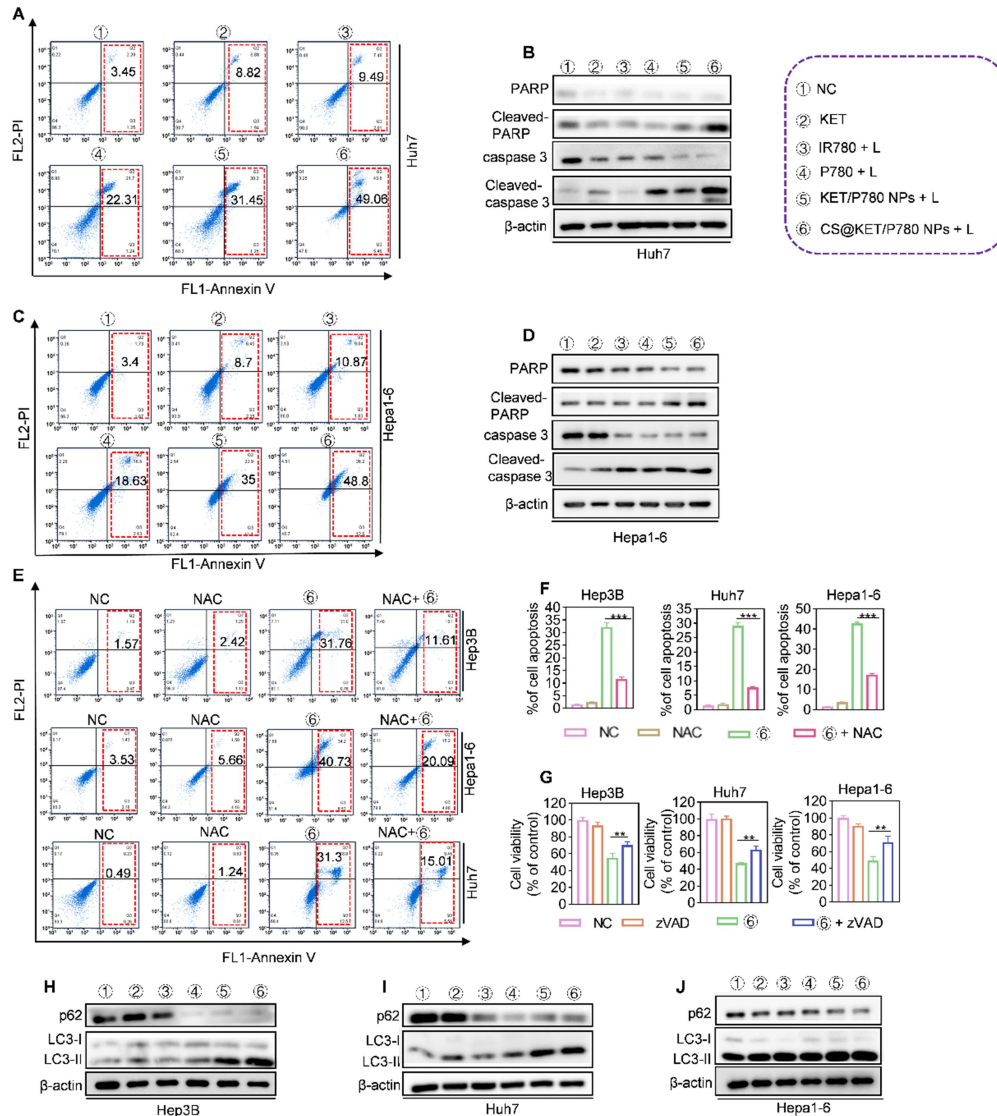

93  
 94 **Figure S7.** CS@KET/P780 NPs evoke apoptosis through ROS accumulation in liver  
 95 cancer cells (808 nm for IR780, 660 nm for P780, KET/P780 NPs and  
 96 CS@KET/P780 NPs;  $P = 1.0 \text{ W cm}^{-2}$ , irradiation time = 30 s;  $C_{\text{KET}} = 4.5 \mu\text{M}$ ,  $C_{\text{P780}} =$   
 97  $2.5 \mu\text{M}$ ). (A, C) Results of apoptosis in Huh7 and Hepa1-6 cells via flow cytometry  
 98 after various treatments. (B-D) Analysis of apoptotic markers using Western blot for  
 99 Huh7 and Hepa1-6 cells after various treatments. (E-F) Flow cytometry results and

quantification of apoptotic cell ratio of apoptosis in Huh7, Hep3B, and Hepa1-6 cells treated with NC, NAC, CS@KET/P780 NPs and CS@KET/P780 NPs+NAC. (G) Cell viability of particular cell populations in Hep3B, Huh7, and Hepa1-6 cells with or without ZVAD therapy. (H-J) Western blot analysis of autophagic markers for Hep3B, Huh7, and Hepa1-6 cells treated with KET, IR780, P780, KET/P780 NPs and CS@KET/P780 NPs. (\*\* $P < 0.01$ , \*\*\* $P < 0.001$ , one-way ANOVA).

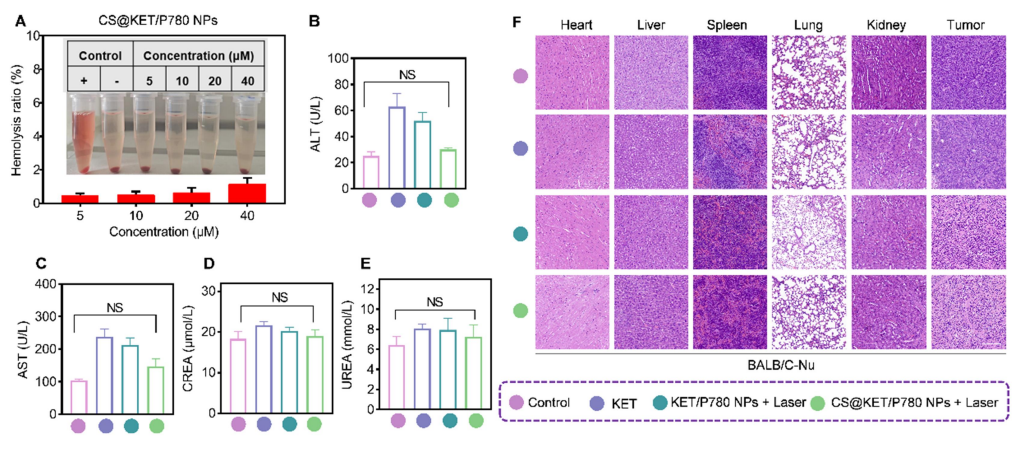

**Figure S8.** *In vivo* biosafety assessment of CS@KET/P780 NPs. (A) Hemolysis rate and photographs of CS@KET/P780 NPs at different concentrations. (B-E) Analysis of the serum biochemistry indicators (ALT (B); AST (C); CREA (D); UREA (E)) after various treatments. (F) H&E staining of the major organs and tumor tissue in a variety of therapeutic groups (Scale bars: 50 μm, NS, not significant).

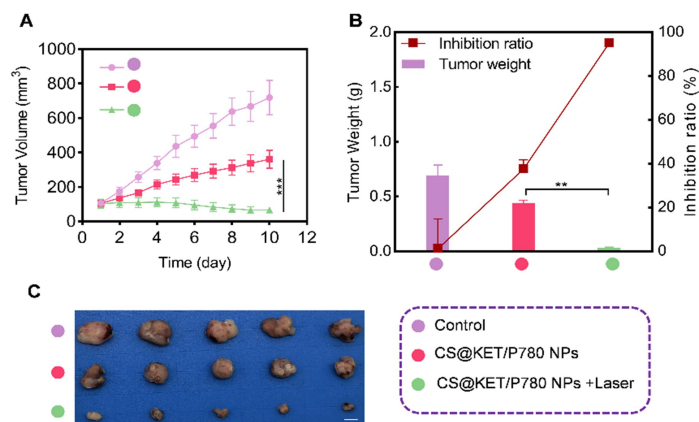

**Figure S9.** *In vivo* anti-liver cancer performance of CS@KET/P780 NPs in C57BL/6

115 mice. The mice were treated with normal saline, CS@KET/P780 NPs without laser  
116 irradiation, or CS@KET/P780 NPs with laser irradiation ( $\lambda = 660$  nm,  $P = 1.0$  W cm<sup>-2</sup>;  
117 irradiation time = 3 min). (A) Tumor volume curves of different groups (n = 5). (B)  
118 The weight of individual tumors and the inhibition ratio. (C) Photographs of the  
119 dissected tumors of different groups (n = 5). (\*\* $P < 0.01$ ; \*\*\* $P < 0.001$ , one-way  
120 ANOVA).
